# Supplementary material for: High-Yield Production of Receptor Binding Domain of SARS-CoV-2 Linked to Bacterial Flagellin in Plants Using Self-Replicating Viral Vector pEff
Source: MDPI journal article supplement (doi:10.3390/plants10122682), 2021-12-06
Supplement: s1 [file s1]

### Supplementary File 3

#### Determination of the efficiency of Flg-RBD expression in *N. benthamiana*

The efficiency of Flg-RBD expression was estimated in Western blot analysis in comparison to known amount of purified Flg-RBD protein. The amount of purified Flg-RBD was measured using a Qubit Protein Assay Kit (Invitrogen, USA).

#### Western blot probed with antibodies against Flg

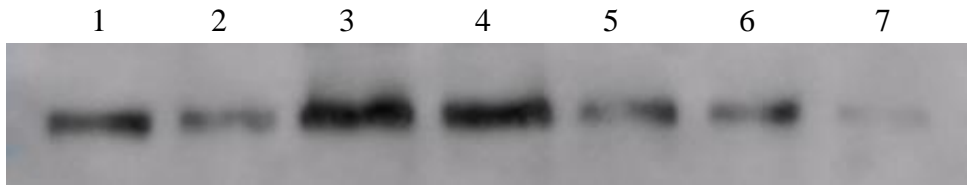

Lanes 1 and 2, – total proteins from 3 mg and 1.5 mg of leaf tissue of *N. benthamiana* infiltrated with pEff-Flg-RBD vector, respectively

Lanes 3-7, - 0.76  $\mu$ g, 0.57  $\mu$ g, 0.38  $\mu$ g, 0.19  $\mu$ g and 0.095  $\mu$ g of purified Flg-RBD protein, respectively

#### Densitometry analysis of Western blot image.

The digital image was subjected to densitometry analysis using Nonlinear Dynamics TotalLab TL120 v2009 software.

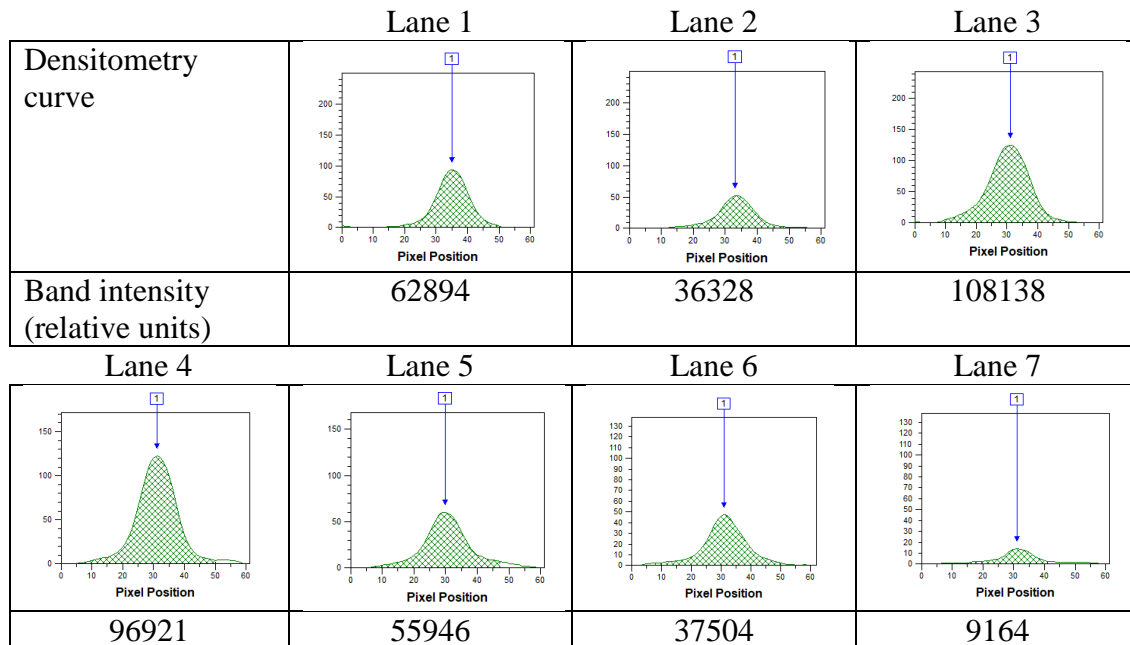

### Calculation of expression efficiency

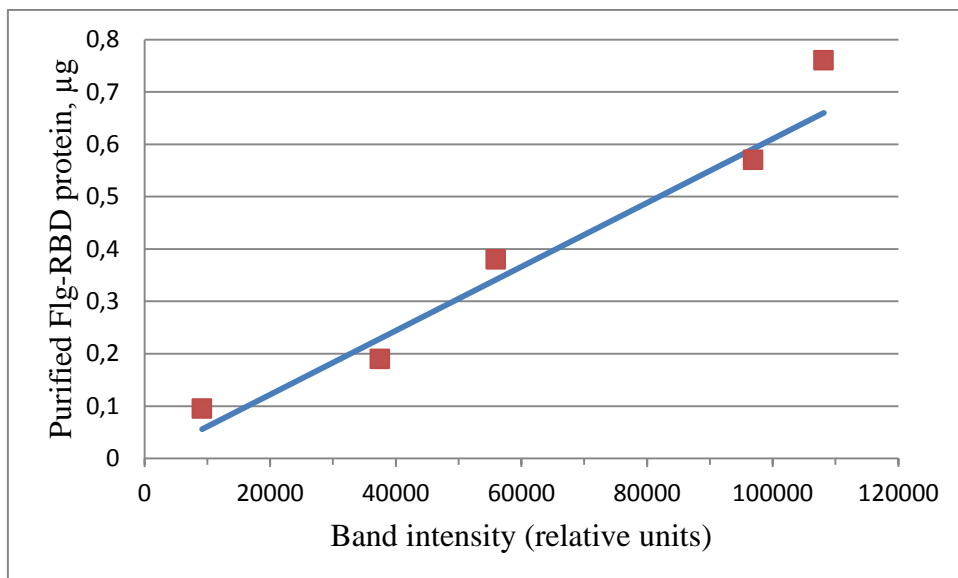

The efficiency of expression = 135 µg per 1 g of leaf tissue.
