# Supplementary material for: High-Yield Production of Receptor Binding Domain of SARS-CoV-2 Linked to Bacterial Flagellin in Plants Using Self-Replicating Viral Vector pEff
Source: MDPI journal article supplement (doi:10.3390/plants10122682), 2021-12-06
Supplement: s1 [file s1]

### Supplementary File 1

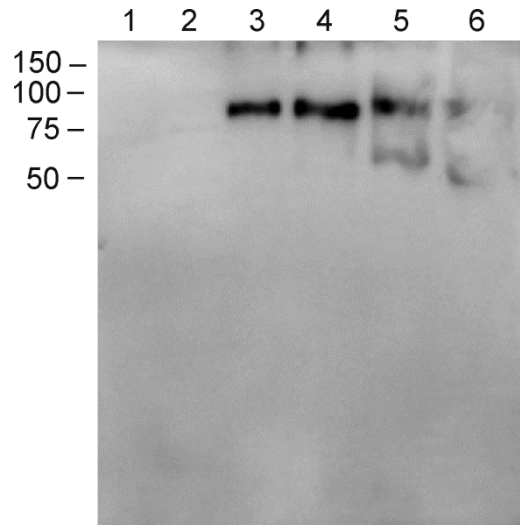

**Figure S1.** Western blot of proteins isolated from *N. benthamiana* plants infiltrated with pEff-Flg-RBD on days 3, 4, 5 and 6 after infiltration.

Lane 1, total proteins isolated from non-infiltrated leaf;

Lane 2, molecular weight marker (sizes are shown in kD);

Lanes 3-6, total protein isolated from leaf infiltrated with pEff-Flg-RBD on days 3, 4, 5 and 6 after infiltration

Western blotting was performed using anti-flagellin antibodies.
